# Supplementary material for: A microfluidic biochip platform for electrical quantification of proteins
Source: Royal Society of Chemistry journal article supplement (doi:10.1039/c8lc00033f), 2018-01-01
Supplement: c8lc00033f1.pdf [file c8lc00033f1.pdf]

## Electronic Supplementary Information

### A Microfluidic Biochip Platform for Electrical Quantification of Proteins

Enrique Valera <sup>1,2,3</sup>, Jacob Berger <sup>1,2,3</sup>, Umer Hassan <sup>1,2,3</sup>, Tanmay Ghonge <sup>1,2,3</sup>,  
Julia Liu <sup>1,3</sup>, Michael Rappleye <sup>1,2,3</sup>, Jackson Winter <sup>1,3</sup>, Daniel Abboud<sup>1,2</sup>,  
Zeeshan Haidry<sup>1,2</sup>, Ryan Healey<sup>1,3</sup>, Na-Teng Hung<sup>1,2</sup>, Nathaniel Leung<sup>1,2</sup>, Naif  
Mansury <sup>1,3</sup>, Alexander Hasnain <sup>1,3</sup>, Christine Lannon <sup>1,3</sup>, Zachary Price <sup>1,3</sup>,  
Karen White <sup>3</sup>, Rashid Bashir <sup>1,2,3,4\*</sup>

<sup>1</sup> Department of Bioengineering, University of Illinois at Urbana-Champaign,  
1270 Digital Computer Laboratory, 1304 W. Springfield Ave., Urbana, Illinois  
61801, USA.

<sup>2</sup> Micro and Nanotechnology Lab, University of Illinois at Urbana-Champaign,  
208 N. Wright St., Urbana, Illinois 61801, USA.

<sup>3</sup> Biomedical Research Center, Carle Foundation Hospital, 509 W University  
Ave., Urbana, Illinois 61801, USA.

<sup>4</sup> Carle Illinois College of Medicine, 807 South Wright St., Urbana, Illinois 61801,  
USA.

#### Table of contents

- S-2. Modified-bead flowing through the channel video
- S-3. Sampling rate
- S-4. Distinguish between different bead types
- S-5. Biotinylated bead capture video

*Modified-bead flowing through the channel video*

Video1\_Valera shows an individual modified-bead flowing through channel (electrodes and aperture). In the video, the modified-bead is flowing by the center of the channel. The aspect ratio between the modified-bead and the aperture can be appreciated. The video is shown in slow motion.

### *Sampling rate*

Based on the dimensions, the volume of the aperture was  $6750 \mu\text{m}^3$ . Thus, the solution required to fill the aperture was  $6.75 \times 10^{-6} \mu\text{L}$ . Considering the used flow rate ( $20 \mu\text{L min}^{-1}$ ),  $20 \mu\text{s}$  were required to fill the aperture. Therefore, in order to meet the Nyquist frequency condition ( $f > 2 \times \text{bandwidth}$ ), we must scan at least every  $10 \mu\text{s}$  ( $100 \text{ KHz}$ ) to guarantee a perfect reconstruction of the event. Based on this and on the MatLab code requirements,  $250 \text{ KHz}$  was chosen as sampling rate.

*Distinguish between different bead types*

The electrical system was able to clearly distinguish between different beads types based on their size and morphology.

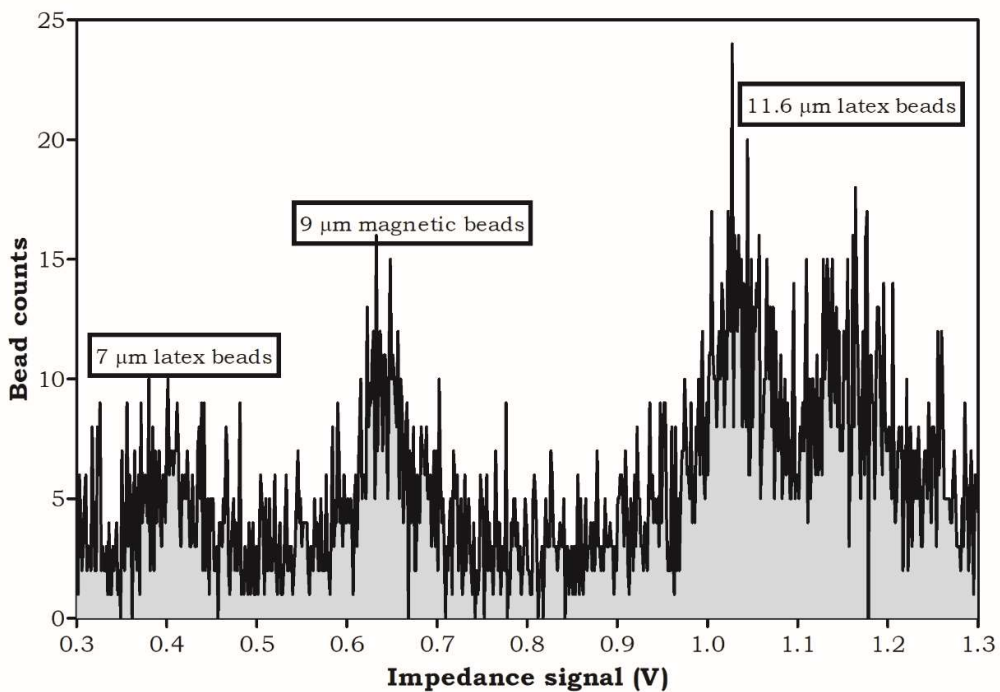

**Figure S1.** Histogram of unmodified 7 μm latex, 9 μm magnetic, and 11.6 μm latex beads. The electrical system was able to clearly distinguish between size and material.

*Bead capture video*

Video2\_Valera shows biotinylated beads flowing through a small section of the capture chamber (about 50 pillars). In the video, the biotinylated bead flowing in the center of the screen, is specifically captured by the pillar placed on the top center of the screen. The video is shown in slow motion.
